# Supplementary figures and images for: Microbiome, Mycobiome and Related Metabolites Alterations in Patients with Metabolic Syndrome—A Pilot Study
Source: MDPI journal article supplement (doi:10.3390/metabo12030218), 2022-02-28

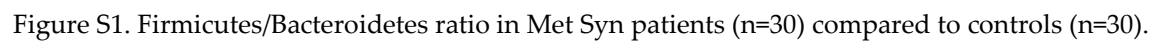

Figure S1. Firmicutes/Bacteroidetes ratio in Met Syn patients (n=30) compared to controls (n=30).

Supplement: s1 [file s1]
